# Supplementary material
Source: Springer Nature journal article supplement (https://www.springermedizin.de/resource/supplementary/12886_2011_228_MOESM4_ESM.pdf/9473564)
Supplement: MOESM4 [file 9473564]

**Change in pumping rate in response to DPOFA or vehicle treatment**

| Time after addition, min. | DPOFA                               |                  | Vehicle                             |                  |
|---------------------------|-------------------------------------|------------------|-------------------------------------|------------------|
|                           | Change in pumping rate <sup>1</sup> | SEM <sup>2</sup> | Change in pumping rate <sup>1</sup> | SEM <sup>2</sup> |
| 10                        | 3.64 (6)                            | 3.49             | -2.44 (5)                           | 2.03             |
| 15                        | 3.17 (4)                            | 0.72             | -1.71 (4)                           | 3.08             |
| 20                        | 2.83 (6)                            | 1.22             | -1.89 (4)                           | 1.30             |
| 30                        | 0.47 (10)                           | 2.04             | -0.44 (7)                           | 0.68             |

<sup>1</sup>Change in pumping rate in comparison with time 0 when DPOFA or vehicle were added is expressed in ( $\mu\text{l}/\text{cm}^2\text{h}$ ); <sup>2</sup>SEM, Standard Error of Means; Number of experiments is shown in parenthesis.
